# Supplementary material for: Comparative plastomes sheds light on phylogeny of Weigela
Source: Frontiers journal article supplement (doi:10.3389/fpls.2024.1487725), 2024-10-29
Supplement: Data_Sheet_1.zip [file Data_Sheet_1.zip]

## Sheet: last
Table S2. Numbers, types, and location of the SSRs in the four chloroplast genomes.
Species	StartPos	Position	Type	EndPos	Repetitions	Motif
Weigela floribunda	377	trnH-psbA	spacer	389	13	A
Weigela floribunda	4435	matK-rps16	spacer	4449	15	A
Weigela floribunda	4682	matK-rps16	spacer	4693	3	AAAT
Weigela floribunda	4766	matK-rps16	spacer	4776	11	A
Weigela floribunda	4880	matK-rps16	spacer	4897	18	A
Weigela floribunda	7827	rps16-trnQ	spacer	7839	13	T
Weigela floribunda	7943	rps16-trnQ	spacer	7956	14	A
Weigela floribunda	9111	psbK-psbI	spacer	9121	11	T
Weigela floribunda	9931	trnS-trnG	spacer	9942	4	AAT
Weigela floribunda	10292	trnG	intron	10303	12	A
Weigela floribunda	11131	trnG-trnR	spacer	11140	10	A
Weigela floribunda	12887	trnR-atpA	spacer	12898	12	A
Weigela floribunda	13504	atpF	intron	13515	12	A
Weigela floribunda	13604	atpF	intron	13618	15	T
Weigela floribunda	14837	atpH-atpI	spacer	14850	14	A
Weigela floribunda	17689	rps2-rpoC2	spacer	17701	13	A
Weigela floribunda	21250	rpoC2	CDS	21259	5	AT
Weigela floribunda	22279	rpoC1	CDS	22288	5	AT
Weigela floribunda	23942	rpoC1	intron	23952	11	A
Weigela floribunda	24117	rpoC1	intron	24128	3	TTAA
Weigela floribunda	27611	rpoB	CDS	27620	10	T
Weigela floribunda	29385	rpoB-trnC	spacer	29399	15	A
Weigela floribunda	32242	psbM-trnD	spacer	32251	10	T
Weigela floribunda	32383	psbM-trnD	spacer	32394	12	A
Weigela floribunda	34060	trnE-trnT	spacer	34069	5	TA
Weigela floribunda	34124	trnE-trnT	spacer	34133	5	AT
Weigela floribunda	34502	trnT-psbD	spacer	34511	10	T
Weigela floribunda	37768	psbC-trnS	spacer	37777	10	A
Weigela floribunda	38026	trnS-psbZ	spacer	38038	13	A
Weigela floribunda	38566	psbZ-trnG	spacer	38575	10	A
Weigela floribunda	38691	psbZ-trnG	spacer	38701	11	A
Weigela floribunda	44816	psaA-ycf3	spacer	44827	4	ATA
Weigela floribunda	44833	psaA-ycf3	spacer	44844	4	AAT
Weigela floribunda	44860	psaA-ycf3	spacer	44871	4	AAT
Weigela floribunda	46986	ycf3-trnS	spacer	46998	13	A
Weigela floribunda	48976	trnT-trnL	spacer	48985	10	T
Weigela floribunda	49068	trnT-trnL	spacer	49078	11	T
Weigela floribunda	49181	trnT-trnL	spacer	49190	10	A
Weigela floribunda	51095	trnF-ndhJ	spacer	51107	13	T
Weigela floribunda	51195	trnF-ndhJ	spacer	51204	10	T
Weigela floribunda	52480	ndhK-ndhC	spacer	52490	11	T
Weigela floribunda	53208	ndhC-trnV	spacer	53221	14	T
Weigela floribunda	53362	ndhC-trnV	spacer	53373	4	TTA
Weigela floribunda	56861	atpB	CDS	56870	10	T
Weigela floribunda	57457	atpB-rbcL	spacer	57468	12	A
Weigela floribunda	59557	rbcL-accD	spacer	59568	12	T
Weigela floribunda	60001	rbcL-accD	spacer	60011	11	T
Weigela floribunda	61951	accD-psaI	spacer	61961	11	T
Weigela floribunda	62277	accD-psaI	spacer	62287	11	A
Weigela floribunda	62681	psaI-ycf4	spacer	62691	11	T
Weigela floribunda	64216	ycf4-cemA	spacer	64229	14	T
Weigela floribunda	66864	petA-psbJ	spacer	66877	7	TA
Weigela floribunda	66892	petA-psbJ	spacer	66905	7	TA
Weigela floribunda	66910	petA-psbJ	spacer	66923	7	TA
Weigela floribunda	70581	trnP-psaJ	spacer	70591	11	T
Weigela floribunda	71284	psaJ-rpl33	spacer	71295	4	TTC
Weigela floribunda	71603	rpl33-rps18	spacer	71612	5	TA
Weigela floribunda	71642	rpl33-rps18	spacer	71653	3	TATT
Weigela floribunda	72309	rps18-rpl20	spacer	72325	17	A
Weigela floribunda	73587	rpl20-rps12	spacer	73598	3	CTTT
Weigela floribunda	75087	clpP	CDS	75099	13	A
Weigela floribunda	82088	rpoA	CDS	82098	11	T
Weigela floribunda	84542	rps8-rpl14	spacer	84554	13	T
Weigela floribunda	86623	rpl16	intron	86633	11	T
Weigela floribunda	88341	rps19-rpl2	spacer	88351	11	T
Weigela floribunda	90482	trnI-ycf2	spacer	90493	3	AAAG
Weigela floribunda	90510	trnI-ycf2	spacer	90521	3	AAAG
Weigela floribunda	90589	trnI-ycf2	spacer	90600	3	AAAG
Weigela floribunda	90622	trnI-ycf2	spacer	90633	3	AAAG
Weigela floribunda	94402	ycf2	CDS	94413	4	GAT
Weigela floribunda	94450	ycf2	CDS	94461	4	GAT
Weigela floribunda	94498	ycf2	CDS	94509	4	GAT
Weigela floribunda	103323	rps7-trnV	spacer	103332	10	T
Weigela floribunda	114686	trnN-ndhF	spacer	114703	3	CCTTCT
Weigela floribunda	117887	ndhF	CDS	117896	10	T
Weigela floribunda	117987	ndhF-trnL	spacer	117998	12	A
Weigela floribunda	118405	ndhF-trnL	spacer	118415	11	T
Weigela floribunda	118824	trnL-ccsA	spacer	118836	13	T
Weigela floribunda	121592	ndhD-psaC	spacer	121602	11	A
Weigela floribunda	123235	ndhG-ndhI	spacer	123244	5	TA
Weigela floribunda	130005	ycf1	CDS	130014	10	T
Weigela floribunda	131581	ycf1	CDS	131590	10	T
Weigela floribunda	132497	ycf1	CDS	132514	3	GAAGGA
Weigela floribunda	143873	trnV-rps7	spacer	143882	10	A
Weigela floribunda	152696	ycf2	CDS	152707	4	ATC
Weigela floribunda	152744	ycf2	CDS	152755	4	ATC
Weigela floribunda	152792	ycf2	CDS	152803	4	ATC
Weigela floribunda	156572	ycf2-trnI	spacer	156583	3	CTTT
Weigela floribunda	156605	ycf2-trnI	spacer	156616	3	CTTT
Weigela floribunda	156684	ycf2-trnI	spacer	156695	3	CTTT
Weigela floribunda	156712	ycf2-trnI	spacer	156723	3	CTTT
Weigela florida	4418	matK-rps16	spacer	4429	12	A
Weigela florida	4661	matK-rps16	spacer	4672	3	AAAT
Weigela florida	4745	matK-rps16	spacer	4754	10	A
Weigela florida	4858	matK-rps16	spacer	4872	15	A
Weigela florida	5143	matK-rps16	spacer	5152	10	T
Weigela florida	7793	rps16-trnQ	spacer	7805	13	T
Weigela florida	7909	rps16-trnQ	spacer	7921	13	A
Weigela florida	9913	trnS-trnG	spacer	9924	4	AAT
Weigela florida	10274	trnG	intron	10285	12	A
Weigela florida	11067	trnG-trnR	spacer	11077	11	T
Weigela florida	11114	trnG-trnR	spacer	11123	10	A
Weigela florida	12865	atpA-atpF	spacer	12882	18	A
Weigela florida	13488	atpF	intron	13500	13	A
Weigela florida	14820	atpH-atpI	spacer	14832	13	A
Weigela florida	17670	rps2-rpoC2	spacer	17683	14	A
Weigela florida	21290	rpoC2	CDS	21299	5	AT
Weigela florida	22319	rpoC1	CDS	22328	5	AT
Weigela florida	23981	rpoC1	intron	23992	12	A
Weigela florida	24157	rpoC1	intron	24168	3	TTAA
Weigela florida	27651	rpoB	CDS	27660	10	T
Weigela florida	34079	trnE-trnT	spacer	34088	5	TA
Weigela florida	34143	trnE-trnT	spacer	34152	5	AT
Weigela florida	34521	trnT-psbD	spacer	34530	10	T
Weigela florida	37653	psbC-trnS	spacer	37662	10	T
Weigela florida	38044	psbC-trnS	spacer	38056	13	A
Weigela florida	38584	psbZ-trnG	spacer	38595	12	A
Weigela florida	44837	psaA-ycf3	spacer	44848	4	ATA
Weigela florida	44854	psaA-ycf3	spacer	44865	4	AAT
Weigela florida	46980	ycf3-trnS	spacer	46999	20	A
Weigela florida	48976	trnT-trnL	spacer	48987	12	T
Weigela florida	49070	trnT-trnL	spacer	49080	11	T
Weigela florida	49183	trnT-trnL	spacer	49192	10	A
Weigela florida	51132	trnF-ndhJ	spacer	51144	13	T
Weigela florida	51232	trnF-ndhJ	spacer	51241	10	T
Weigela florida	52517	ndhJ	CDS	52527	11	T
Weigela florida	53288	ndhC-trnV	spacer	53301	14	T
Weigela florida	53442	ndhC-trnV	spacer	53453	4	TTA
Weigela florida	56940	atpB	CDS	56949	10	T
Weigela florida	57535	atpB-rbcL	spacer	57547	13	A
Weigela florida	59636	rbcL-accD	spacer	59647	12	T
Weigela florida	60217	accD-ycf4	spacer	60226	10	G
Weigela florida	61873	accD-ycf4	spacer	61882	10	T
Weigela florida	62198	accD-ycf4	spacer	62208	11	A
Weigela florida	62602	accD-ycf4	spacer	62612	11	T
Weigela florida	66454	petA-psbJ	spacer	66463	10	T
Weigela florida	66780	petA-psbJ	spacer	66793	7	TA
Weigela florida	66808	petA-psbJ	spacer	66821	7	TA
Weigela florida	66889	petA-psbJ	spacer	66900	12	A
Weigela florida	70487	trnP-psaJ	spacer	70497	11	T
Weigela florida	71198	psaJ-rpl33	spacer	71209	4	TTC
Weigela florida	71517	rpl33-rps18	spacer	71526	5	TA
Weigela florida	71556	rpl33-rps18	spacer	71567	3	TATT
Weigela florida	72244	rps18-rpl20	spacer	72256	13	A
Weigela florida	73518	rpl20-rps12	spacer	73529	3	CTTT
Weigela florida	75037	clpP	CDS	75048	12	A
Weigela florida	82055	rpoA	CDS	82067	13	T
Weigela florida	83666	rpl36-infA	spacer	83676	11	A
Weigela florida	84511	rps8-rpl14	spacer	84527	17	T
Weigela florida	85055	rpl14-rpl16	spacer	85064	10	A
Weigela florida	86610	rpl16	CDS	86619	10	T
Weigela florida	88306	rps19-rpl2	spacer	88316	11	T
Weigela florida	90446	trnI-ycf2	spacer	90457	3	AAAG
Weigela florida	90474	trnI-ycf2	spacer	90485	3	AAAG
Weigela florida	90507	trnI-ycf2	spacer	90518	3	AAAG
Weigela florida	90553	trnI-ycf2	spacer	90564	3	AAAG
Weigela florida	90586	trnI-ycf2	spacer	90597	3	AAAG
Weigela florida	90619	trnI-ycf2	spacer	90630	3	AAAG
Weigela florida	94381	trnI-ycf2	spacer	94392	4	GAT
Weigela florida	94429	trnI-ycf2	spacer	94440	4	GAT
Weigela florida	94477	trnI-ycf2	spacer	94488	4	GAT
Weigela florida	103323	rps7-trnV	spacer	103332	10	T
Weigela florida	114857	trnN-ndhF	spacer	114880	4	CCTTCT
Weigela florida	118266	rpl32-trnL	spacer	118277	12	A
Weigela florida	118684	rpl32-trnL	spacer	118693	10	T
Weigela florida	119102	trnL-ccsA	spacer	119112	11	T
Weigela florida	121868	ndhD-psaC	spacer	121878	11	A
Weigela florida	123511	ndhG-ndhI	spacer	123520	5	TA
Weigela florida	130311	ycf1	CDS	130320	10	T
Weigela florida	132374	ycf1	CDS	132391	3	TTATCA
Weigela florida	132878	ycf1	CDS	132901	4	GAAGGA
Weigela florida	144431	trnV-rps7	spacer	144440	10	A
Weigela florida	153275	ycf2	CDS	153286	4	ATC
Weigela florida	153323	ycf2	CDS	153334	4	ATC
Weigela florida	153371	ycf2	CDS	153382	4	ATC
Weigela florida	157133	ycf2-trnI	spacer	157144	3	CTTT
Weigela florida	157166	ycf2-trnI	spacer	157177	3	CTTT
Weigela florida	157199	ycf2-trnI	spacer	157210	3	CTTT
Weigela florida	157245	ycf2-trnI	spacer	157256	3	CTTT
Weigela florida	157278	ycf2-trnI	spacer	157289	3	CTTT
Weigela florida	157306	ycf2-trnI	spacer	157317	3	CTTT
Weigela japonica var. sinica	383	trnH-418	spacer	394	12	A
Weigela japonica var. sinica	4428	matK-rps16	spacer	4441	14	A
Weigela japonica var. sinica	4673	matK-rps16	spacer	4684	3	AAAT
Weigela japonica var. sinica	4757	matK-rps16	spacer	4769	13	A
Weigela japonica var. sinica	4873	matK-rps16	spacer	4885	13	A
Weigela japonica var. sinica	7813	rps16-trnQ	spacer	7824	12	T
Weigela japonica var. sinica	7928	rps16-trnQ	spacer	7941	14	A
Weigela japonica var. sinica	9096	psbK-psbI	spacer	9107	12	T
Weigela japonica var. sinica	9933	trnS-trnG	spacer	9944	4	AAT
Weigela japonica var. sinica	10294	trnG	intron	10304	11	A
Weigela japonica var. sinica	10536	trnG	intron	10546	11	T
Weigela japonica var. sinica	11089	trnG	intron	11099	11	T
Weigela japonica var. sinica	11136	trnG	intron	11145	10	A
Weigela japonica var. sinica	12887	atpA-atpF	spacer	12899	13	A
Weigela japonica var. sinica	13505	atpF	intron	13515	11	A
Weigela japonica var. sinica	13604	atpF	intron	13620	17	T
Weigela japonica var. sinica	14839	atpH-atpI	spacer	14852	14	A
Weigela japonica var. sinica	17691	rps2-rpoC2	spacer	17703	13	A
Weigela japonica var. sinica	19888	rpoC2	CDS	19898	11	T
Weigela japonica var. sinica	21252	rpoC2	CDS	21261	5	AT
Weigela japonica var. sinica	22281	rpoC1	CDS	22290	5	AT
Weigela japonica var. sinica	23936	rpoC1	intron	23946	11	C
Weigela japonica var. sinica	23947	rpoC1	intron	23957	11	A
Weigela japonica var. sinica	24122	rpoC1	intron	24133	3	TTAA
Weigela japonica var. sinica	27616	rpoB	CDS	27625	10	T
Weigela japonica var. sinica	29384	rpoB-trnC	spacer	29399	16	A
Weigela japonica var. sinica	32250	psbM-trnD	spacer	32259	10	T
Weigela japonica var. sinica	32391	psbM-trnD	spacer	32402	12	A
Weigela japonica var. sinica	34060	trnE-trnT	spacer	34069	5	TA
Weigela japonica var. sinica	34124	trnE-trnT	spacer	34133	5	AT
Weigela japonica var. sinica	34502	trnT-psbD	spacer	34512	11	T
Weigela japonica var. sinica	37635	psbC-trnS	spacer	37644	10	T
Weigela japonica var. sinica	37770	psbC-trnS	spacer	37779	10	A
Weigela japonica var. sinica	38028	trnS-psbZ	spacer	38038	11	A
Weigela japonica var. sinica	38566	psbZ-trnG	spacer	38576	11	A
Weigela japonica var. sinica	38696	psbZ-trnG	spacer	38706	11	A
Weigela japonica var. sinica	44821	psaA-ycf3	spacer	44832	4	ATA
Weigela japonica var. sinica	44838	psaA-ycf3	spacer	44849	4	AAT
Weigela japonica var. sinica	46964	ycf3-trnS	spacer	46979	16	A
Weigela japonica var. sinica	48957	trnT-trnL	spacer	48966	10	T
Weigela japonica var. sinica	49049	trnT-trnL	spacer	49058	10	T
Weigela japonica var. sinica	49161	trnT-trnL	spacer	49171	11	A
Weigela japonica var. sinica	51112	trnF-ndhJ	spacer	51125	14	T
Weigela japonica var. sinica	52497	ndhK-ndhC	spacer	52506	10	T
Weigela japonica var. sinica	53224	ndhC-trnV	spacer	53237	14	T
Weigela japonica var. sinica	53378	ndhC-trnV	spacer	53389	4	TTA
Weigela japonica var. sinica	56876	atpB	CDS	56885	10	T
Weigela japonica var. sinica	57472	atpB-rbcL	spacer	57484	13	A
Weigela japonica var. sinica	59573	rbcL-accD	spacer	59583	11	T
Weigela japonica var. sinica	60025	rbcL-accD	spacer	60034	10	T
Weigela japonica var. sinica	61868	accD-psaI	spacer	61878	11	T
Weigela japonica var. sinica	62194	accD-psaI	spacer	62204	11	A
Weigela japonica var. sinica	62617	psaI-ycf4	spacer	62627	11	T
Weigela japonica var. sinica	64152	ycf4-cemA	spacer	64163	12	T
Weigela japonica var. sinica	66474	petA-psbJ	spacer	66484	11	T
Weigela japonica var. sinica	66800	petA-psbJ	spacer	66813	7	TA
Weigela japonica var. sinica	66881	petA-psbJ	spacer	66891	11	A
Weigela japonica var. sinica	70473	trnP-psaJ	spacer	70483	11	T
Weigela japonica var. sinica	71158	psaJ-rpl33	spacer	71169	4	TTC
Weigela japonica var. sinica	71477	rpl33-rps18	spacer	71486	5	TA
Weigela japonica var. sinica	71516	rpl33-rps18	spacer	71527	3	TATT
Weigela japonica var. sinica	72162	rps18-rpl20	spacer	72176	15	A
Weigela japonica var. sinica	73438	rpl20-rps12	spacer	73449	3	CTTT
Weigela japonica var. sinica	74938	clpP	CDS	74951	14	A
Weigela japonica var. sinica	81933	rpoA	CDS	81943	11	T
Weigela japonica var. sinica	84387	rps8-rpl14	spacer	84401	15	T
Weigela japonica var. sinica	86470	rpl16	intron	86480	11	T
Weigela japonica var. sinica	88206	rps19-rpl2	spacer	88215	10	T
Weigela japonica var. sinica	90345	trnI-ycf2	spacer	90356	3	AAAG
Weigela japonica var. sinica	90373	trnI-ycf2	spacer	90384	3	AAAG
Weigela japonica var. sinica	90512	trnI-ycf2	spacer	90523	3	AAAG
Weigela japonica var. sinica	90545	trnI-ycf2	spacer	90556	3	AAAG
Weigela japonica var. sinica	94325	ycf2	CDS	94336	4	GAT
Weigela japonica var. sinica	94373	ycf2	CDS	94384	4	GAT
Weigela japonica var. sinica	103212	rps7-trnV	spacer	103221	10	T
Weigela japonica var. sinica	117713	ndhF-rpl32	spacer	117722	10	T
Weigela japonica var. sinica	117807	rpl32-trnL	spacer	117822	16	A
Weigela japonica var. sinica	118229	rpl32-trnL	spacer	118238	10	T
Weigela japonica var. sinica	118647	trnL-ccsA	spacer	118656	10	T
Weigela japonica var. sinica	121411	ndhD-psaC	spacer	121421	11	A
Weigela japonica var. sinica	123054	ndhG-ndhI	spacer	123063	5	TA
Weigela japonica var. sinica	129848	ycf1	CDS	129857	10	T
Weigela japonica var. sinica	131424	ycf1	CDS	131433	10	T
Weigela japonica var. sinica	143611	trnV-rps7	spacer	143620	10	A
Weigela japonica var. sinica	152448	ycf2	CDS	152459	4	ATC
Weigela japonica var. sinica	152496	ycf2	CDS	152507	4	ATC
Weigela japonica var. sinica	156276	ycf2-trnI	spacer	156287	3	CTTT
Weigela japonica var. sinica	156309	ycf2-trnI	spacer	156320	3	CTTT
Weigela japonica var. sinica	156448	ycf2-trnI	spacer	156459	3	CTTT
Weigela japonica var. sinica	156476	ycf2-trnI	spacer	156487	3	CTTT
Weigela subsessilis	366	trnH-psbA	spacer	376	11	T
Weigela subsessilis	4420	matK-rps16	spacer	4430	11	A
Weigela subsessilis	4662	matK-rps16	spacer	4673	3	AAAT
Weigela subsessilis	4746	matK-rps16	spacer	4756	11	A
Weigela subsessilis	4860	matK-rps16	spacer	4873	14	A
Weigela subsessilis	5144	rps16	CDS	5153	10	T
Weigela subsessilis	7824	rps16-trnQ	spacer	7834	11	T
Weigela subsessilis	7938	rps16-trnQ	spacer	7951	14	A
Weigela subsessilis	9942	trnS-trnG	spacer	9953	4	AAT
Weigela subsessilis	10303	trnG	intron	10313	11	A
Weigela subsessilis	11095	trnG-trnR	spacer	11105	11	T
Weigela subsessilis	11142	trnG-trnR	spacer	11151	10	A
Weigela subsessilis	12893	atpA-atpF	spacer	12909	17	A
Weigela subsessilis	13515	atpF	CDS	13525	11	A
Weigela subsessilis	13614	atpF	CDS	13627	14	T
Weigela subsessilis	14846	atpH-atpI	spacer	14857	12	A
Weigela subsessilis	17696	rps2-rpoC2	spacer	17710	15	A
Weigela subsessilis	21283	rpoC2	CDS	21292	5	AT
Weigela subsessilis	22312	rpoC1	CDS	22321	5	AT
Weigela subsessilis	23975	rpoC1	CDS	23985	11	A
Weigela subsessilis	24150	rpoC1	CDS	24161	3	TTAA
Weigela subsessilis	27644	rpoB	CDS	27653	10	T
Weigela subsessilis	29410	rpoB-trnC	spacer	29420	11	A
Weigela subsessilis	34076	trnE-trnT	spacer	34085	5	TA
Weigela subsessilis	34140	trnE-trnT	spacer	34149	5	AT
Weigela subsessilis	34518	trnT-psbD	spacer	34528	11	T
Weigela subsessilis	37651	psbC-trnS	spacer	37661	11	T
Weigela subsessilis	38044	trnS-psbZ	spacer	38054	11	A
Weigela subsessilis	38582	psbZ-trnG	spacer	38592	11	A
Weigela subsessilis	38709	psbZ-trnG	spacer	38718	10	A
Weigela subsessilis	44833	psaA-ycf3	spacer	44844	4	ATA
Weigela subsessilis	44850	psaA-ycf3	spacer	44861	4	AAT
Weigela subsessilis	46976	ycf3-trnS	spacer	46994	19	A
Weigela subsessilis	48972	trnT-trnL	spacer	48983	12	T
Weigela subsessilis	49066	trnT-trnL	spacer	49076	11	T
Weigela subsessilis	49179	trnT-trnL	spacer	49188	10	A
Weigela subsessilis	51092	trnF-ndhJ	spacer	51104	13	T
Weigela subsessilis	51192	trnF-ndhJ	spacer	51201	10	T
Weigela subsessilis	52477	ndhK-ndhC	spacer	52487	11	T
Weigela subsessilis	53205	ndhC-trnV	spacer	53217	13	T
Weigela subsessilis	53358	ndhC-trnV	spacer	53369	4	TTA
Weigela subsessilis	56856	atpB	CDS	56865	10	T
Weigela subsessilis	57451	atpB-rbcL	spacer	57463	13	A
Weigela subsessilis	59552	rbcL-accD	spacer	59562	11	T
Weigela subsessilis	60144	accD	CDS	60157	14	G
Weigela subsessilis	62074	accD-psaI	spacer	62083	10	T
Weigela subsessilis	62399	accD-psaI	spacer	62409	11	A
Weigela subsessilis	62803	psaI-ycf4	spacer	62813	11	T
Weigela subsessilis	66654	petA-psbJ	spacer	66663	10	T
Weigela subsessilis	66980	petA-psbJ	spacer	66997	9	TA
Weigela subsessilis	67000	petA-psbJ	spacer	67009	5	TA
Weigela subsessilis	67012	petA-psbJ	spacer	67025	7	TA
Weigela subsessilis	70690	trnP-psaJ	spacer	70700	11	T
Weigela subsessilis	71401	psaJ-rpl33	spacer	71412	4	TTC
Weigela subsessilis	71720	rpl33-rps18	spacer	71729	5	TA
Weigela subsessilis	71759	rpl33-rps18	spacer	71770	3	TATT
Weigela subsessilis	72468	rps18-rpl20	spacer	72480	13	A
Weigela subsessilis	73734	rpl20-rps12	spacer	73745	3	CTTT
Weigela subsessilis	75254	clpP	CDS	75265	12	A
Weigela subsessilis	83890	rpl36-infA	spacer	83900	11	A
Weigela subsessilis	84735	rps8-rpl14	spacer	84753	19	T
Weigela subsessilis	85281	rpl14-rpl16	spacer	85290	10	A
Weigela subsessilis	86814	rpl16	intron	86825	12	T
Weigela subsessilis	88512	rps19-rpl2	spacer	88522	11	T
Weigela subsessilis	90652	trnI-ycf2	spacer	90663	3	AAAG
Weigela subsessilis	90680	trnI-ycf2	spacer	90691	3	AAAG
Weigela subsessilis	90713	trnI-ycf2	spacer	90724	3	AAAG
Weigela subsessilis	90759	trnI-ycf2	spacer	90770	3	AAAG
Weigela subsessilis	90792	trnI-ycf2	spacer	90803	3	AAAG
Weigela subsessilis	90825	trnI-ycf2	spacer	90836	3	AAAG
Weigela subsessilis	94572	ycf2	CDS	94583	4	GAT
Weigela subsessilis	94620	ycf2	CDS	94631	4	GAT
Weigela subsessilis	94668	ycf2	CDS	94679	4	GAT
Weigela subsessilis	103496	rps7-trnV	spacer	103505	10	T
Weigela subsessilis	118450	rpl32-trnL	spacer	118461	12	A
Weigela subsessilis	118868	rpl32-trnL	spacer	118877	10	T
Weigela subsessilis	119286	trnL-ccsA	spacer	119296	11	T
Weigela subsessilis	122052	ndhD-psaC	spacer	122062	11	A
Weigela subsessilis	123695	ndhG-ndhI	spacer	123704	5	TA
Weigela subsessilis	130558	ycf1	CDS	130567	10	T
Weigela subsessilis	132134	ycf1	CDS	132143	10	T
Weigela subsessilis	132534	ycf1	CDS	132551	3	TTATCA
Weigela subsessilis	144565	trnV-rps7	spacer	144574	10	A
Weigela subsessilis	153391	ycf2	CDS	153402	4	ATC
Weigela subsessilis	153439	ycf2	CDS	153450	4	ATC
Weigela subsessilis	153487	ycf2	CDS	153498	4	ATC
Weigela subsessilis	157234	ycf2-trnI	spacer	157245	3	CTTT
Weigela subsessilis	157267	ycf2-trnI	spacer	157278	3	CTTT
Weigela subsessilis	157300	ycf2-trnI	spacer	157311	3	CTTT
Weigela subsessilis	157346	ycf2-trnI	spacer	157357	3	CTTT
Weigela subsessilis	157379	ycf2-trnI	spacer	157390	3	CTTT
Weigela subsessilis	157407	ycf2-trnI	spacer	157418	3	CTTT
